# Supplementary material
Source: MDPI journal article supplement (https://www.mdpi.com/1999-4907/11/6/696)
Supplement: s1 [file s1]

## Appendix A – The survey

Gender:

- ☐ male
- ☐ female

Age in years:

- ☐ to 20
- ☐ 21 - 40
- ☐ 41 - 60
- ☐ 61 or more

How long do you work in kindergarten as teacher?

- ☐ to 5 years
- ☐ 5 to 15 years
- ☐ more than 15 years

Name of kindergarten, town:

Kindergarten unit:

Children group age:

How far is your kindergarten unit from the forest?

- ☐ 0 to 1 km
- ☐ 1 to 2 km
- ☐ 2 to 3 km
- ☐ more than 3 km

How many times have you visited the forest with children group in the last month?

- ☐ never
- ☐ 1x
- ☐ 2 – 4x
- ☐ more than 4x

How long do you stay on average in the forest with the children group per visit?

- ☐ to 1 hour
- ☐ 1 to 2 hours
- ☐ 2 to 3 hours
- ☐ more than 3 hours

When our group visits the forest, the most important to me is the presence of:

Mark up to 3 answers

- ☐ water (river, stream, lake, puddles, wetland...)
- ☐ stones and rocks
- ☐ benches and tables
- ☐ trees
- ☐ meadow (forest clearing)
- ☐ dead wood (dry branches, felled trees...)
- ☐ paths/trails
- ☐ underground (ferns, flowers...)
- ☐ shrubs
- ☐ other:

To which of tree types of forest (below) you would decide for visit with your children group?

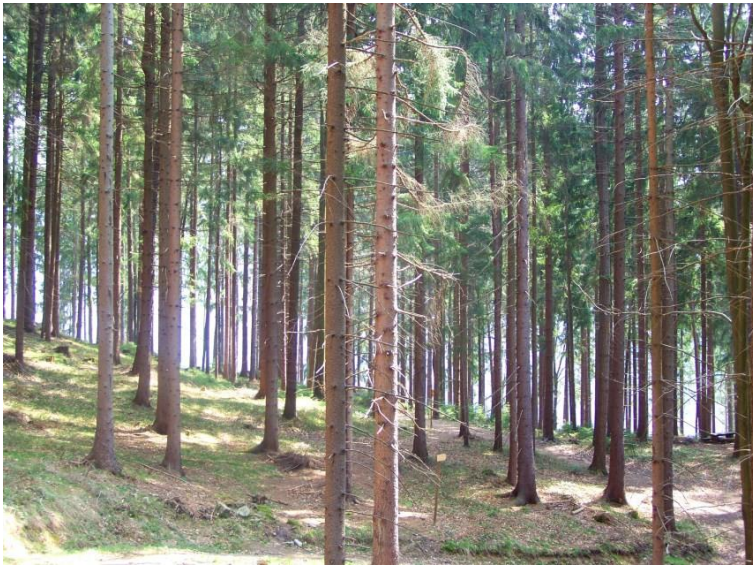

☐

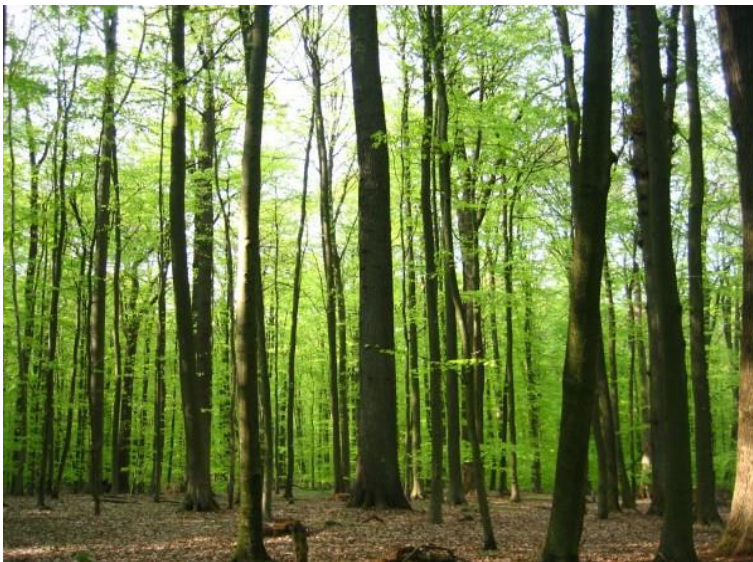

☐

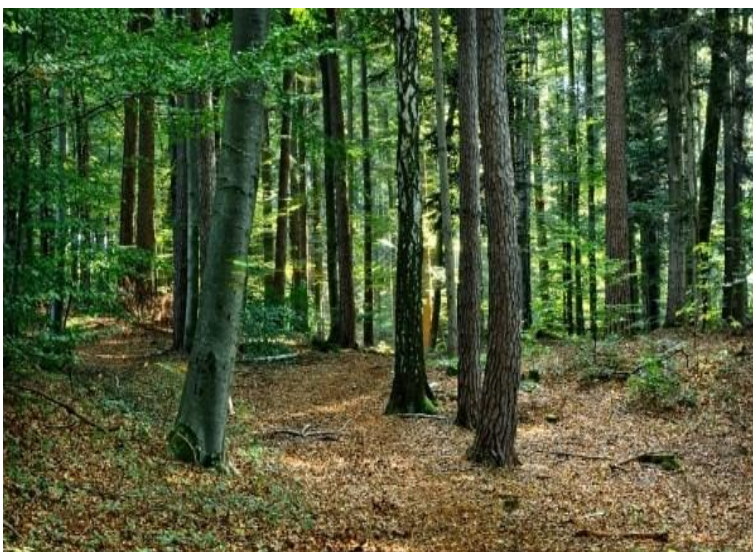

☐

Drag the forest images below into the frames due to suitability for visit with group of kindergarten children. 1 - the most suitable to 5 - less suitable.

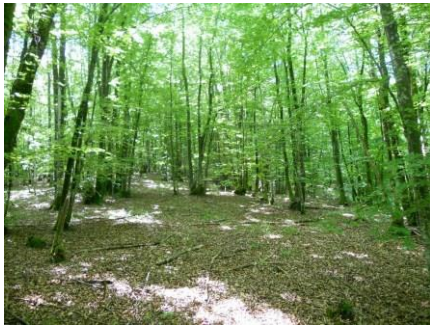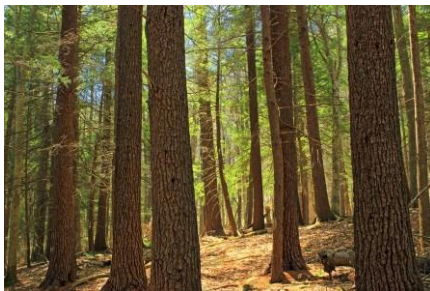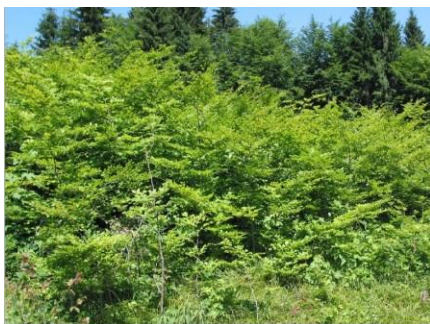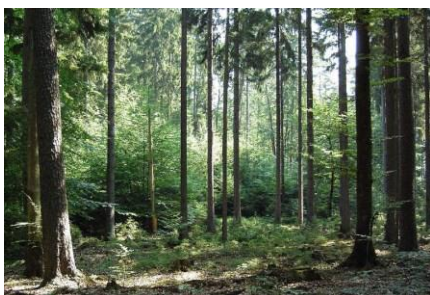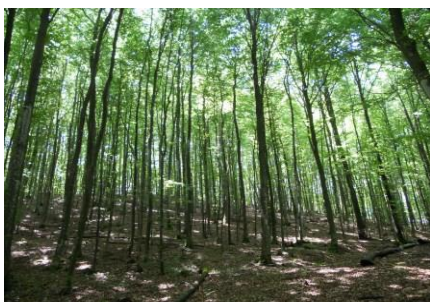

1

2

3

4

5
